# Supplementary material for: EDDA 2.0: integrated simulation of debris flow initiation and dynamics considering two initiation mechanisms
Source: Copernicus journal article supplement (doi:10.5194/gmd-11-2841-2018), 2018-07-13
Supplement: Supplementary file 1 [file gmd-11-2841-2018-supplement.zip]

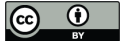

## *Supplement of*

# **EDDA 2.0: integrated simulation of debris flow initiation and dynamics considering two initiation mechanisms**

**Ping Shen et al.**

*Correspondence to:* Limin Zhang (cezhangl@ust.hk)

- gmd-11-2841-2018-supplement-title-page.pdf
- source code EDDA version 2.0
  - test 1 rainfall runoff
    - \* EDDA 2.0
  - test 2 infiltration process
    - \* Case 1
    - \* Case 2
    - \* Case 3
    - \* Case 4
  - test 3 slope stability analysis
    - \* EDDA 2.0
  - test 4 field application
    - \* EDDA 2.0

The copyright of individual parts of the supplement might differ from the CC BY 4.0 License.
